# Supplementary material for: Modifiable factors for migraine prophylaxis: A mendelian randomization analysis
Source: PubMed Central journal article supplement (PMC9878312; doi:10.3389/fphar.2023.1010996), 2023-01-12
Supplement: DataSheet1.pdf [file DataSheet1.pdf]

# **Modifiable risk factors for the prevention of migraine: a mendelian randomization analysis**

## **Contents**

|                                                                                    |    |
|------------------------------------------------------------------------------------|----|
| eTable 1. Reference articles reporting risk factors of migraine pathogenesis ..... | 2  |
| eTable 2. Weighted median analysis for migraine without aura (MwoA) .....          | 4  |
| eTable 3. MR-Egger analysis for migraine without aura (MwoA) .....                 | 6  |
| eTable 4. IVW radial analysis for migraine without aura (MwoA) .....               | 8  |
| eTable 5. Heterogeneity test (MwoA) .....                                          | 10 |
| eTable 6. Weighted median analysis of risk factors of MwA .....                    | 13 |
| eTable 7. MR-Egger analysis of risk factors of MwA .....                           | 15 |
| eTable 8. IVW Radial analysis (MwA) .....                                          | 17 |
| eTable 9. Heterogeneity test (MwA) .....                                           | 19 |

**Table 1. Reference articles reporting risk factors of migraine pathogenesis**

| No. | Reference articles                                                                                                                                                                                                                                                       |
|-----|--------------------------------------------------------------------------------------------------------------------------------------------------------------------------------------------------------------------------------------------------------------------------|
| 1   | Amin FM, Aristeidou S, Baraldi C, et al. The association between migraine and physical exercise. <i>J Headache Pain</i> . 2018;19(1):83. doi:10.1186/s10194-018-0902-y                                                                                                   |
| 2   | Ashina M, Buse DC, Ashina H, et al. Migraine: integrated approaches to clinical management and emerging treatments. <i>Lancet</i> . 2021;397(10283):1505-1518. doi:10.1016/S0140-6736(20)32342-4                                                                         |
| 3   | Ashina M, Katsarava Z, Do TP, et al. Migraine: epidemiology and systems of care. <i>Lancet</i> . 2021;397(10283):1485-1495. doi:10.1016/S0140-6736(20)32160-7                                                                                                            |
| 4   | Ashina M, Terwindt GM, Al-Karagholi MAM, et al. Migraine: disease characterisation, biomarkers, and precision medicine. <i>Lancet</i> . 2021;397(10283):1496-1504. doi:10.1016/S0140-6736(20)32162-0                                                                     |
| 5   | Assarzagdegan F, Hosseinpanahi SP, Hesami O, Mansouri B, Lima BS. Frequency of dyslipidemia in migraineurs in comparison to control group. <i>J Family Med Prim Care</i> . 2019;8(3):950-954. doi:10.4103/jfmpc.jfmpc_9_19                                               |
| 6   | Barber M, Pace A. Exercise and Migraine Prevention: a Review of the Literature. <i>Curr Pain Headache Rep</i> . 2020;24(8):39. doi:10.1007/s11916-020-00868-6                                                                                                            |
| 7   | Buse DC, Greisman JD, Baigi K, Lipton RB. Migraine Progression: A Systematic Review. <i>Headache</i> . 2019;59(3):306-338. doi:10.1111/head.13459                                                                                                                        |
| 8   | Dasari VR, Clark AJ, Boorigie ME, Gerson T, Connelly MA, Bickel JL. The Influence of Lifestyle Factors on the Burden of Pediatric Migraine. <i>J Pediatr Nurs</i> . 2021;57:79-83. doi:10.1016/j.pedn.2020.12.003                                                        |
| 9   | Gazerani P. Migraine and Diet. <i>Nutrients</i> . 2020;12(6). doi:10.3390/nu12061658                                                                                                                                                                                     |
| 10  | Goadsby PJ, Holland PR, Martins-Oliveira M, Hoffmann J, Schankin C, Akerman S. Pathophysiology of Migraine: A Disorder of Sensory Processing. <i>Physiol Rev</i> . 2017;97(2):553-622. doi:10.1152/physrev.00034.2015                                                    |
| 11  | Hagen K, Åsberg AN, Stovner L, et al. Lifestyle factors and risk of migraine and tension-type headache. Follow-up data from the Nord-Trøndelag Health Surveys 1995-1997 and 2006-2008. <i>Cephalalgia</i> . 2018;38(13):1919-1926. doi:10.1177/0333102418764888          |
| 12  | Krøll LS, Hammarlund CS, Westergaard ML, et al. Level of physical activity, well-being, stress and self-rated health in persons with migraine and co-existing tension-type headache and neck pain. <i>J Headache Pain</i> . 2017;18(1):46. doi:10.1186/s10194-017-0753-y |
| 13  | Lemmens J, De Pauw J, Van Soom T, et al. The effect of aerobic exercise on the number of migraine days, duration and pain intensity in migraine: a systematic literature review and meta-analysis. <i>J Headache Pain</i> . 2019;20(1):16. doi:10.1186/s10194-019-0961-8 |

- 14 Leso V, Gervetti P, Mauro S, Macrini MC, Ercolano ML, Iavicoli I. Shift work and  
migraine: A systematic review. *J Occup Health*. 2020;62(1):e12116.  
doi:10.1002/1348-9585.12116
- 15 Liampas I, Mylonas KS, Brotis A, et al. Serum lipid abnormalities in migraine: A  
meta-analysis of observational studies. *Headache*. 2021;61(1):44-59.  
doi:10.1111/head.14039
- 16 Liampas I, Siokas V, Mentis AFA, et al. Serum Homocysteine, Pyridoxine, Folate,  
and Vitamin B12 Levels in Migraine: Systematic Review and Meta-Analysis.  
*Headache*. 2020;60(8):1508-1534. doi:10.1111/head.13892
- 17 Marmura MJ. Triggers, Protectors, and Predictors in Episodic Migraine. *Curr  
Pain Headache Rep*. 2018;22(12):81. doi:10.1007/s11916-018-0734-0
- 18 May A, Schulte LH. Chronic migraine: risk factors, mechanisms and treatment.  
*Nat Rev Neurol*. 2016;12(8):455-464. doi:10.1038/nrneurol.2016.93
- 19 Minen MT, Begasse De Dhaem O, Kroon Van Diest A, et al. Migraine and its  
psychiatric comorbidities. *J Neurol Neurosurg Psychiatry*. 2016;87(7):741-749.  
doi:10.1136/jnnp-2015-312233
- 20 Nazari F, Safavi M, Mahmudi M. Migraine and its relation with lifestyle in  
women. *Pain Pract*. 2010;10(3):228-234. doi:10.1111/j.1533-  
2500.2009.00343.x
- 21 Nowaczewska M, Wiciński M, Kaźmierczak W. The Ambiguous Role of Caffeine  
in Migraine Headache: From Trigger to Treatment. *Nutrients*.  
2020;12(8):E2259. doi:10.3390/nu12082259
- 22 Puledda F, Messina R, Goadsby PJ. An update on migraine: current  
understanding and future directions. *Journal of Neurology*. 2017;264(9):2031.  
doi:10.1007/s00415-017-8434-y
- 23 Robblee J, Starling AJ. SEEDS for success: Lifestyle management in migraine.  
*CCJM*. 2019;86(11):741-749. doi:10.3949/ccjm.86a.19009
- 24 Shaik MM, Tan HL, Kamal MA, Gan SH. Do folate, vitamins B<sub>6</sub> and B<sub>12</sub> play a role  
in the pathogenesis of migraine? The role of pharmacoepigenomics. *CNS Neurol  
Disord Drug Targets*. 2014;13(5):828-835.  
doi:10.2174/18715273113129990112
- 25 Stubberud A, Buse DC, Kristoffersen ES, Linde M, Tronvik E. Is there a causal  
relationship between stress and migraine? Current evidence and implications  
for management. *J Headache Pain*. 2021;22(1):155. doi:10.1186/s10194-021-  
01369-6
- 26 Urits I, Yilmaz M, Bahrin E, et al. Utilization of B12 for the treatment of chronic  
migraine. *Best Pract Res Clin Anaesthesiol*. 2020;34(3):479-491.  
doi:10.1016/j.bpa.2020.07.009
-

**eTable 2. Weighted median analysis for migraine without aura (MwoA)**

| Exposure                                    | No. of SNP | Beta     | se       | P-value  | OR          | 95%CI lower bound | 95%CI upper bound |
|---------------------------------------------|------------|----------|----------|----------|-------------|-------------------|-------------------|
| Alcohol intake frequency                    | 42         | 0.044545 | 0.258606 | 0.863242 | 1.045551689 | 0.6298            | 1.7357            |
| Alcoholic drinks per week                   | 34         | -0.44603 | 0.466397 | 0.338899 | 0.640161424 | 0.2566            | 1.597             |
| Average weekly red wine intake              | 18         | -0.24116 | 0.694223 | 0.728308 | 0.785718154 | 0.2015            | 3.0634            |
| Coffee intake                               | 38         | -0.35536 | 0.430641 | 0.40926  | 0.700918653 | 0.3014            | 1.6302            |
| Decaffeinated coffee intake                 | 14         | -0.3683  | 0.630371 | 0.559046 | 0.691909254 | 0.2011            | 2.3803            |
| Carbohydrate                                | 19         | 0.10096  | 0.306928 | 0.742204 | 1.106232135 | 0.6062            | 2.0189            |
| Process meat                                | 23         | 0.066917 | 0.619435 | 0.913972 | 1.069207175 | 0.3175            | 3.6003            |
| Cheese intake                               | 61         | -0.19326 | 0.349818 | 0.58064  | 0.82427013  | 0.4152            | 1.6362            |
| Saturated fat intake                        | 11         | 0.017369 | 0.423576 | 0.967292 | 1.017520517 | 0.4436            | 2.334             |
| Polyunsaturated fat intake                  | 15         | -0.49051 | 0.319181 | 0.124352 | 0.612316636 | 0.3276            | 1.1446            |
| Total sugar intake                          | 18         | -0.2146  | 0.296171 | 0.468717 | 0.806867553 | 0.4515            | 1.4418            |
| Blood methionine                            | 13         | -0.77815 | 1.590605 | 0.624689 | 0.459255185 | 0.0203            | 10.375            |
| Blood selenium                              | 12         | 2.034245 | 3.527401 | 0.564144 | 7.646473848 | 0.0076            | 7692.1            |
| Blood zinc                                  | 7          | 0.147272 | 0.079867 | 0.065188 | 1.158669037 | 0.9908            | 1.355             |
| Vitamin D intake                            | 14         | 7.666355 | 5.463248 | 0.160539 | 2135.283721 | 0.0478            | 1E+08             |
| Carotene intake                             | 16         | 0.139665 | 0.329805 | 0.671948 | 1.149888005 | 0.6024            | 2.1948            |
| Iron intake                                 | 13         | -0.14519 | 0.393474 | 0.712125 | 0.864854984 | 0.4               | 1.8701            |
| Calcium intake                              | 19         | -0.06902 | 0.324528 | 0.831574 | 0.933306299 | 0.4941            | 1.7631            |
| Folate intake                               | 14         | 0.124083 | 0.333338 | 0.709711 | 1.132110062 | 0.589             | 2.1759            |
| Vitamin B6 intake                           | 16         | 0.080377 | 0.396694 | 0.839434 | 1.08369572  | 0.498             | 2.3582            |
| Vitamin B12 intake                          | 9          | -1.03943 | 0.448706 | 0.020531 | 0.353655544 | 0.1468            | 0.8522            |
| Vitamin E intake                            | 11         | 0.228044 | 0.315396 | 0.469656 | 1.256140404 | 0.677             | 2.3308            |
| Omega-3 status                              | 49         | 0.036071 | 0.073731 | 0.624687 | 1.036728958 | 0.8972            | 1.1979            |
| Omega-6 status                              | 53         | -0.03556 | 0.131617 | 0.787046 | 0.965068451 | 0.7456            | 1.2491            |
| Omega-7, omega-9, and saturated fatty acids | 7          | 0.091391 | 0.138686 | 0.509912 | 1.09569703  | 0.8349            | 1.4379            |
| Eicosapentaenoic acid status                | 7          | 0.360106 | 0.602642 | 0.550143 | 1.433481842 | 0.44              | 4.6706            |
| Docosahexaenoic acid status                 | 35         | -0.69262 | 0.389912 | 0.075677 | 0.500265227 | 0.233             | 1.0742            |
| Years of schooling                          | 305        | -0.57696 | 0.189367 | 0.002313 | 0.561600388 | 0.3875            | 0.814             |
| Stress owing to financial difficulties      | 86         | 3.551321 | 1.200246 | 0.003088 | 34.85932046 | 3.3163            | 366.43            |
| Anxiety disorder                            | 17         | 22.17949 | 13.36347 | 0.096973 | 4289746330  | 0.0181            | #####             |
| Depression                                  | 31         | -0.24121 | 2.962999 | 0.935118 | 0.785675752 | 0.0024            | 261.46            |
| Sleep duration                              | 69         | -0.12025 | 0.465819 | 0.796292 | 0.886698037 | 0.3558            | 2.2095            |

|                                                    |     |          |          |          |             |        |        |
|----------------------------------------------------|-----|----------|----------|----------|-------------|--------|--------|
| Night shift work                                   | 7   | 0.11231  | 0.37809  | 0.766431 | 1.118859824 | 0.5333 | 2.3475 |
| Snoring                                            | 41  | -0.3849  | 0.938362 | 0.68167  | 0.680517137 | 0.1082 | 4.2814 |
| Insomnia                                           | 39  | -0.73802 | 0.619344 | 0.233412 | 0.4780598   | 0.142  | 1.6095 |
| Years of smoking                                   | 10  | 0.143755 | 0.34503  | 0.676939 | 1.154600696 | 0.5871 | 2.2705 |
| Heavy physical activity                            | 17  | -0.24383 | 1.7571   | 0.889631 | 0.783617522 | 0.025  | 24.535 |
| Light physical activity                            | 12  | -2.5827  | 1.708111 | 0.130528 | 0.075569645 | 0.0027 | 2.1494 |
| Number of days/weeks of vigorous physical activity | 11  | -0.23922 | 0.400391 | 0.550198 | 0.787242051 | 0.3592 | 1.7256 |
| Number of days/weeks of moderate physical activity | 18  | 0.040923 | 0.282823 | 0.884951 | 1.041772193 | 0.5985 | 1.8135 |
| Body mass index                                    | 432 | -0.05495 | 0.142448 | 0.699689 | 0.946534349 | 0.7159 | 1.2514 |
| Waist-to-hip ratio                                 | 30  | -0.35577 | 0.289522 | 0.21914  | 0.700634214 | 0.3972 | 1.2358 |
| Fasting glucose                                    | 30  | -0.22955 | 0.320554 | 0.473921 | 0.794888816 | 0.4241 | 1.4899 |
| Fasting proinsulin                                 | 8   | 0.058108 | 0.185029 | 0.753485 | 1.059829565 | 0.7375 | 1.5231 |
| Hemoglobin A1c                                     | 11  | -0.49968 | 0.403394 | 0.21546  | 0.606724604 | 0.2752 | 1.3377 |
| Systolic blood pressure                            | 437 | -0.01264 | 0.007665 | 0.099035 | 0.987435896 | 0.9727 | 1.0024 |
| Diastolic blood pressure                           | 437 | 0.001963 | 0.012957 | 0.879604 | 1.001964555 | 0.9768 | 1.0277 |
| High density lipoprotein                           | 326 | -0.18255 | 0.111965 | 0.103003 | 0.833138878 | 0.669  | 1.0376 |
| Low density lipoprotein                            | 158 | -0.11745 | 0.118916 | 0.323326 | 0.88918742  | 0.7043 | 1.1226 |
| Total cholesterol                                  | 84  | -0.18738 | 0.103232 | 0.069495 | 0.829124653 | 0.6772 | 1.0151 |
| Total triglycerides                                | 12  | 0.077631 | 0.11593  | 0.503087 | 1.080724287 | 0.8611 | 1.3564 |

**Table 3. MR-Egger analysis for migraine without aura (MwoA)**

| Exposure                                    | No. of SNP | Beta     | se       | P-value  | OR       | 95%CI lower bound | 95%CI upper bound |
|---------------------------------------------|------------|----------|----------|----------|----------|-------------------|-------------------|
| Alcohol intake frequency                    | 42         | -0.2859  | 0.546947 | 0.604052 | 0.751337 | 0.257196          | 2.194855          |
| Alcoholic drinks per week                   | 34         | 0.115252 | 0.742284 | 0.877586 | 1.122157 | 0.261944          | 4.807271          |
| Average weekly red wine intake              | 18         | 1.742635 | 2.526081 | 0.500168 | 5.712375 | 0.040418          | 807.3475          |
| Coffee intake                               | 38         | -0.36647 | 0.637051 | 0.568691 | 0.693175 | 0.198872          | 2.416081          |
| Decaffeinated coffee intake                 | 14         | -0.61879 | 0.956572 | 0.529884 | 0.538593 | 0.082606          | 3.511653          |
| Carbohydrate                                | 19         | -0.53467 | 0.623568 | 0.403128 | 0.585861 | 0.172585          | 1.988781          |
| Process meat                                | 23         | 2.182983 | 2.530413 | 0.398049 | 8.872733 | 0.062248          | 1264.703          |
| Cheese intake                               | 61         | 0.430733 | 1.08542  | 0.69292  | 1.538385 | 0.183289          | 12.91199          |
| Saturated fat intake                        | 11         | -1.88481 | 0.936701 | 0.075064 | 0.151858 | 0.024216          | 0.952301          |
| Polyunsaturated fat intake                  | 15         | -0.25772 | 0.45752  | 0.582814 | 0.772809 | 0.315227          | 1.894615          |
| Total sugar intake                          | 18         | -0.48933 | 0.451782 | 0.294817 | 0.61304  | 0.252885          | 1.48612           |
| Blood methionine                            | 13         | 6.468834 | 3.81334  | 0.117897 | 644.7316 | 0.36593           | 1135952           |
| Blood selenium                              | 12         | 24.15379 | 51.00037 | 0.645955 | 3.09E+10 | 1.2E-33           | 7.98E+53          |
| Blood zinc                                  | 7          | 0.235158 | 0.308028 | 0.479659 | 1.265109 | 0.691718          | 2.313805          |
| Vitamin D intake                            | 14         | 26.20825 | 18.1969  | 0.175371 | 2.41E+11 | 7.81E-05          | 7.44E+26          |
| Carotene intake                             | 16         | 0.090179 | 0.528443 | 0.86694  | 1.094371 | 0.388459          | 3.083075          |
| Iron intake                                 | 13         | -0.28143 | 0.765325 | 0.720057 | 0.754706 | 0.168391          | 3.38248           |
| Calcium intake                              | 19         | -1.4376  | 0.890781 | 0.124965 | 0.237498 | 0.041439          | 1.361157          |
| Folate intake                               | 14         | 0.13362  | 0.438175 | 0.765631 | 1.142959 | 0.484226          | 2.697818          |
| Vitamin B6 intake                           | 16         | -0.77846 | 0.796924 | 0.345231 | 0.459113 | 0.096286          | 2.189146          |
| Vitamin B12 intake                          | 9          | 0.304947 | 0.802174 | 0.715106 | 1.356552 | 0.281587          | 6.535225          |
| Vitamin E intake                            | 11         | 0.260825 | 0.484371 | 0.603305 | 1.298001 | 0.502308          | 3.354133          |
| Omega-3 status                              | 49         | 0.074332 | 0.085638 | 0.389816 | 1.077165 | 0.910721          | 1.274028          |
| Omega-6 status                              | 53         | -0.12677 | 0.167378 | 0.452289 | 0.880933 | 0.634553          | 1.222975          |
| Omega-7, omega-9, and saturated fatty acids | 7          | 0.596644 | 0.421332 | 0.215919 | 1.816013 | 0.795195          | 4.147288          |
| Eicosapentaenoic acid status                | 7          | -0.304   | 1.378504 | 0.834179 | 0.737858 | 0.049496          | 10.99965          |
| Docosahexaenoic acid status                 | 35         | -0.44025 | 0.67059  | 0.516044 | 0.643873 | 0.172975          | 2.396725          |
| Years of schooling                          | 305        | -0.37612 | 0.531347 | 0.479579 | 0.686522 | 0.242305          | 1.945117          |
| Stress owing to financial difficulties      | 86         | 0.290065 | 2.606228 | 0.911646 | 1.336514 | 0.008082          | 221.0243          |
| Anxiety disorder                            | 17         | 4.221181 | 21.10368 | 0.844151 | 68.11386 | 7.4E-17           | 6.27E+19          |
| Depression                                  | 31         | -4.10716 | 6.299766 | 0.519565 | 0.016454 | 7.14E-08          | 3790.988          |
| Sleep duration                              | 69         | 1.220952 | 1.300847 | 0.351317 | 3.390412 | 0.264819          | 43.40665          |

|                                                    |     |          |          |          |          |          |          |
|----------------------------------------------------|-----|----------|----------|----------|----------|----------|----------|
| Night shift work                                   | 7   | 0.442115 | 0.887633 | 0.639556 | 1.555995 | 0.273174 | 8.862914 |
| Snoring                                            | 41  | -2.73391 | 3.408674 | 0.427387 | 0.064965 | 8.15E-05 | 51.78435 |
| Insomnia                                           | 39  | -1.4231  | 1.20971  | 0.246949 | 0.240966 | 0.022502 | 2.580364 |
| Years of smoking                                   | 10  | -0.13078 | 0.638415 | 0.84281  | 0.877415 | 0.251059 | 3.066441 |
| Heavy physical activity                            | 17  | -0.92317 | 8.710355 | 0.916999 | 0.397259 | 1.53E-08 | 10315194 |
| Light physical activity                            | 12  | -1.42637 | 5.14343  | 0.787184 | 0.24018  | 1.01E-05 | 5737.368 |
| Number of days/weeks of vigorous physical activity | 11  | -0.74284 | 2.416045 | 0.765487 | 0.475759 | 0.004176 | 54.1958  |
| Number of days/weeks of moderate physical activity | 18  | -1.18113 | 1.342258 | 0.39191  | 0.306933 | 0.022105 | 4.261842 |
| Body mass index                                    | 432 | -0.27649 | 0.221558 | 0.212741 | 0.758444 | 0.49128  | 1.170895 |
| Waist-to-hip ratio                                 | 30  | 0.128864 | 0.932648 | 0.891095 | 1.137536 | 0.182843 | 7.077034 |
| Fasting glucose                                    | 30  | -0.71996 | 0.469365 | 0.136275 | 0.48677  | 0.193996 | 1.221394 |
| Fasting proinsulin                                 | 8   | 0.202068 | 0.342475 | 0.576705 | 1.223931 | 0.625513 | 2.394848 |
| Hemoglobin A1c                                     | 11  | -0.02044 | 1.089306 | 0.98544  | 0.979769 | 0.115848 | 8.286286 |
| Systolic blood pressure                            | 437 | 0.00013  | 0.012479 | 0.991708 | 1.00013  | 0.975964 | 1.024894 |
| Diastolic blood pressure                           | 437 | -0.00157 | 0.020869 | 0.940201 | 0.998435 | 0.95842  | 1.04012  |
| High density lipoprotein                           | 326 | -0.13209 | 0.09552  | 0.167654 | 0.876259 | 0.726648 | 1.056675 |
| Low density lipoprotein                            | 158 | -0.13872 | 0.108029 | 0.201017 | 0.870473 | 0.704368 | 1.075751 |
| Total cholesterol                                  | 84  | -0.25364 | 0.10744  | 0.020614 | 0.775975 | 0.628627 | 0.957861 |
| Total triglycerides                                | 12  | -0.08829 | 0.2718   | 0.751987 | 0.915491 | 0.537394 | 1.559607 |

**eTable 4. IVW radial analysis for migraine without aura (MwoA)**

| Exposure                                    | No. of SNP | Beta     | se       | P-value  | OR       | 95%CI lower bound | 95%CI upper bound |
|---------------------------------------------|------------|----------|----------|----------|----------|-------------------|-------------------|
| Alcohol intake frequency                    | 42         | 0.191017 | 0.191265 | 0.317939 | 1.21048  | 0.83205           | 1.761027          |
| Alcoholic drinks per week                   | 34         | -0.24864 | 0.289216 | 0.38995  | 0.77986  | 0.442416          | 1.374681          |
| Average weekly red wine intake              | 18         | -0.61792 | 0.523726 | 0.238059 | 0.539065 | 0.193124          | 1.504686          |
| Coffee intake                               | 38         | -0.4576  | 0.312502 | 0.143113 | 0.632803 | 0.342974          | 1.167551          |
| Decaffeinated coffee intake                 | 14         | -0.47212 | 0.523705 | 0.367324 | 0.62368  | 0.223447          | 1.740797          |
| Carbohydrate                                | 19         | -0.16751 | 0.172397 | 0.33121  | 0.845764 | 0.603257          | 1.185759          |
| Process meat                                | 23         | -0.16364 | 0.502352 | 0.74462  | 0.84905  | 0.317192          | 2.272711          |
| Cheese intake                               | 61         | 0.107281 | 0.255189 | 0.674193 | 1.113248 | 0.675104          | 1.835748          |
| Saturated fat intake                        | 11         | -0.22738 | 0.283116 | 0.421901 | 0.796619 | 0.457359          | 1.387535          |
| Polyunsaturated fat intake                  | 15         | -0.16244 | 0.24531  | 0.507864 | 0.85007  | 0.525584          | 1.374888          |
| Total sugar intake                          | 18         | -0.2515  | 0.182625 | 0.168462 | 0.77763  | 0.543651          | 1.112312          |
| Blood methionine                            | 13         | 0.03024  | 1.152497 | 0.979067 | 1.030702 | 0.107673          | 9.866401          |
| Blood selenium                              | 12         | 1.783807 | 2.166252 | 0.41025  | 5.952472 | 0.08526           | 415.5738          |
| Blood zinc                                  | 7          | 0.067822 | 0.075962 | 0.371945 | 1.070174 | 0.922135          | 1.24198           |
| Vitamin D intake                            | 14         | 6.042302 | 4.072644 | 0.137907 | 420.8606 | 0.143692          | 1232659           |
| Carotene intake                             | 16         | -0.03775 | 0.178502 | 0.832523 | 0.962956 | 0.678676          | 1.366315          |
| Iron intake                                 | 13         | -0.02589 | 0.245849 | 0.916143 | 0.974446 | 0.601848          | 1.577715          |
| Calcium intake                              | 19         | -0.02995 | 0.226578 | 0.894835 | 0.970493 | 0.622479          | 1.513073          |
| Folate intake                               | 14         | 0.027732 | 0.207318 | 0.89359  | 1.02812  | 0.684811          | 1.543535          |
| Vitamin B6 intake                           | 16         | -0.08051 | 0.347014 | 0.816535 | 0.922647 | 0.46736           | 1.821461          |
| Vitamin B12 intake                          | 9          | -0.72025 | 0.362992 | 0.047232 | 0.486629 | 0.238898          | 0.99125           |
| Vitamin E intake                            | 11         | -0.21128 | 0.231941 | 0.362339 | 0.809549 | 0.51382           | 1.275483          |
| Omega-3 status                              | 49         | 0.017978 | 0.061438 | 0.76981  | 1.018141 | 0.902633          | 1.14843           |
| Omega-6 status                              | 53         | -0.05382 | 0.081164 | 0.507235 | 0.947599 | 0.808232          | 1.110997          |
| Omega-7, omega-9, and saturated fatty acids | 7          | 0.069528 | 0.09465  | 0.462598 | 1.072002 | 0.890487          | 1.290517          |
| Eicosapentaenoic acid status                | 7          | 0.773604 | 0.38599  | 0.045048 | 2.167564 | 1.017211          | 4.618841          |
| Docosahexaenoic acid status                 | 35         | -0.41869 | 0.269186 | 0.119848 | 0.657905 | 0.388175          | 1.115061          |
| Years of schooling                          | 305        | -0.55461 | 0.135686 | 4.36E-05 | 0.574298 | 0.440189          | 0.749265          |
| Stress owing to financial difficulties      | 86         | 2.099185 | 0.863611 | 0.015069 | 8.159514 | 1.501564          | 44.33888          |
| Anxiety disorder                            | 17         | 21.45353 | 9.837375 | 0.029197 | 2.08E+09 | 8.778219          | 4.91E+17          |
| Depression                                  | 31         | 1.433766 | 2.256172 | 0.525112 | 4.194464 | 0.050371          | 349.2762          |
| Sleep duration                              | 69         | -0.36231 | 0.330022 | 0.272279 | 0.696068 | 0.364529          | 1.329143          |
| Night shift work                            | 7          | 0.296614 | 0.181587 | 0.102373 | 1.345296 | 0.942428          | 1.920381          |
| Snoring                                     | 41         | -0.48649 | 0.643379 | 0.449562 | 0.614782 | 0.174207          | 2.169582          |
| Insomnia                                    | 39         | 0.143205 | 0.421436 | 0.734006 | 1.153966 | 0.505195          | 2.635887          |
| Years of smoking                            | 10         | 0.237871 | 0.235878 | 0.313239 | 1.268545 | 0.798956          | 2.014139          |

|                                                    |     |          |          |          |          |          |          |
|----------------------------------------------------|-----|----------|----------|----------|----------|----------|----------|
| Heavy physical activity                            | 17  | -0.79845 | 1.339955 | 0.551259 | 0.450028 | 0.032557 | 6.220605 |
| Light physical activity                            | 12  | -2.18117 | 1.225756 | 0.075166 | 0.112909 | 0.010218 | 1.247714 |
| Number of days/weeks of vigorous physical activity | 11  | -0.38596 | 0.274156 | 0.159191 | 0.6798   | 0.397205 | 1.16345  |
| Number of days/weeks of moderate physical activity | 18  | -0.18673 | 0.182506 | 0.306238 | 0.829668 | 0.580166 | 1.186468 |
| Body mass index                                    | 432 | 0.160367 | 0.081912 | 0.050254 | 1.173942 | 0.999819 | 1.378389 |
| Waist-to-hip ratio                                 | 30  | -0.12356 | 0.181775 | 0.496676 | 0.883771 | 0.618884 | 1.262029 |
| Fasting glucose                                    | 30  | -0.12794 | 0.223794 | 0.567547 | 0.87991  | 0.567467 | 1.364381 |
| Fasting proinsulin                                 | 8   | 0.019742 | 0.137042 | 0.885453 | 1.019938 | 0.77969  | 1.334216 |
| Hemoglobin A1c                                     | 11  | -0.4647  | 0.409957 | 0.256987 | 0.628322 | 0.281332 | 1.403281 |
| Systolic blood pressure                            | 437 | -0.00492 | 0.004955 | 0.320817 | 0.995093 | 0.985475 | 1.004804 |
| Diastolic blood pressure                           | 437 | 0.01569  | 0.008602 | 0.068146 | 1.015814 | 0.998831 | 1.033086 |
| High density lipoprotein                           | 326 | -0.09285 | 0.062668 | 0.138458 | 0.911333 | 0.805995 | 1.030437 |
| Low density lipoprotein                            | 158 | -0.08061 | 0.073631 | 0.273621 | 0.922555 | 0.798576 | 1.065781 |
| Total cholesterol                                  | 84  | -0.09468 | 0.067007 | 0.157647 | 0.909662 | 0.797706 | 1.037331 |
| Total triglycerides                                | 12  | 0.059238 | 0.093157 | 0.524848 | 1.061027 | 0.883954 | 1.273573 |

**eTable 5. Heterogeneity test (MwoA)**

| Exposure                                    | Method                    | Q-value  | Q_df | P-value  |
|---------------------------------------------|---------------------------|----------|------|----------|
| Alcohol intake frequency                    | Inverse variance weighted | 54.51262 | 41   | 0.076951 |
| Alcoholic drinks per week                   | Inverse variance weighted | 26.66417 | 33   | 0.774184 |
| Average weekly red wine intake              | Inverse variance weighted | 19.39142 | 17   | 0.306533 |
| Coffee intake                               | Inverse variance weighted | 38.29645 | 37   | 0.410461 |
| Decaffeinated coffee intake                 | Inverse variance weighted | 22.82021 | 13   | 0.043885 |
| Carbohydrate                                | Inverse variance weighted | 9.985644 | 18   | 0.932374 |
| Process meat                                | Inverse variance weighted | 30.77157 | 22   | 0.100885 |
| Cheese intake                               | Inverse variance weighted | 67.94857 | 60   | 0.224797 |
| Saturated fat intake                        | Inverse variance weighted | 8.14712  | 10   | 0.614469 |
| Polyunsaturated fat intake                  | Inverse variance weighted | 16.29944 | 14   | 0.295432 |
| Total sugar intake                          | Inverse variance weighted | 12.50989 | 17   | 0.768328 |
| Blood methionine                            | Inverse variance weighted | 11.7526  | 12   | 0.465747 |
| Blood selenium                              | Inverse variance weighted | 8.131778 | 11   | 0.701453 |
| Blood zinc                                  | Inverse variance weighted | 8.635173 | 6    | 0.195159 |
| Vitamin D intake                            | Inverse variance weighted | 15.09206 | 13   | 0.301641 |
| Carotene intake                             | Inverse variance weighted | 7.885002 | 15   | 0.92831  |
| Iron intake                                 | Inverse variance weighted | 8.512539 | 12   | 0.743905 |
| Calcium intake                              | Inverse variance weighted | 17.08543 | 18   | 0.517239 |
| Folate intake                               | Inverse variance weighted | 10.30364 | 13   | 0.668936 |
| Vitamin B6 intake                           | Inverse variance weighted | 29.46235 | 15   | 0.014015 |
| Vitamin B12 intake                          | Inverse variance weighted | 11.05317 | 8    | 0.198705 |
| Vitamin E intake                            | Inverse variance weighted | 8.935094 | 10   | 0.538274 |
| Omega-3 status                              | Inverse variance weighted | 55.5208  | 48   | 0.212415 |
| Omega-6 status                              | Inverse variance weighted | 49.6739  | 52   | 0.565885 |
| Omega-7, omega-9, and saturated fatty acids | Inverse variance weighted | 4.946173 | 6    | 0.550735 |
| Eicosapentaenoic acid status                | Inverse variance weighted | 3.804596 | 6    | 0.7031   |
| Docosahexaenoic acid status                 | Inverse variance weighted | 38.35537 | 34   | 0.278503 |
| Years of schooling                          | Inverse variance weighted | 350.4869 | 304  | 0.034102 |
| Stress owing to financial difficulties      | Inverse variance weighted | 93.12477 | 85   | 0.256205 |
| Anxiety disorder                            | Inverse variance weighted | 17.94802 | 16   | 0.326949 |
| Depression                                  | Inverse variance weighted | 39.09844 | 30   | 0.123539 |
| Sleep duration                              | Inverse variance weighted | 80.06582 | 68   | 0.15022  |
| Night shift work                            | Inverse variance weighted | 2.336928 | 6    | 0.886253 |
| Snoring                                     | Inverse variance weighted | 40.97262 | 40   | 0.427655 |
| Insomnia                                    | Inverse variance weighted | 40.6328  | 38   | 0.355157 |
| Years of smoking                            | Inverse variance weighted | 6.706376 | 9    | 0.667659 |
| Heavy physical activity                     | Inverse variance weighted | 22.71448 | 16   | 0.121583 |
| Light physical activity                     | Inverse variance weighted | 11.17844 | 11   | 0.428438 |
| Number of days/weeks of vigorous            | Inverse variance weighted | 8.091923 | 10   | 0.619858 |

|                                                    |                           |          |     |          |
|----------------------------------------------------|---------------------------|----------|-----|----------|
| physical activity                                  |                           |          |     |          |
| Number of days/weeks of moderate physical activity | Inverse variance weighted | 12.16205 | 17  | 0.790226 |
| Body mass index                                    | Inverse variance weighted | 446.0425 | 431 | 0.29835  |
| Waist-to-hip ratio                                 | Inverse variance weighted | 21.31314 | 29  | 0.847488 |
| Fasting glucose                                    | Inverse variance weighted | 32.55715 | 29  | 0.295958 |
| Fasting proinsulin                                 | Inverse variance weighted | 6.977267 | 7   | 0.431251 |
| Hemoglobin A1c                                     | Inverse variance weighted | 19.5097  | 10  | 0.034246 |
| Systolic blood pressure                            | Inverse variance weighted | 469.7801 | 436 | 0.12754  |
| Diastolic blood pressure                           | Inverse variance weighted | 497.6532 | 436 | 0.021736 |
| High density lipoprotein                           | Inverse variance weighted | 351.3996 | 325 | 0.15041  |
| Low density lipoprotein                            | Inverse variance weighted | 161.4808 | 157 | 0.386657 |
| Total cholesterol                                  | Inverse variance weighted | 95.68587 | 83  | 0.161175 |
| Total triglycerides                                | Inverse variance weighted | 14.90952 | 11  | 0.186677 |
| Alcohol intake frequency                           | MR Egger                  | 53.35648 | 40  | 0.076905 |
| Alcoholic drinks per week                          | MR Egger                  | 26.36824 | 32  | 0.747092 |
| Average weekly red wine intake                     | MR Egger                  | 18.34481 | 16  | 0.304096 |
| Coffee intake                                      | MR Egger                  | 38.26757 | 36  | 0.366894 |
| Decaffeinated coffee intake                        | MR Egger                  | 22.75442 | 12  | 0.029885 |
| Carbohydrate                                       | MR Egger                  | 9.583448 | 17  | 0.920164 |
| Process meat                                       | MR Egger                  | 29.51307 | 21  | 0.102218 |
| Cheese intake                                      | MR Egger                  | 67.84039 | 59  | 0.201272 |
| Saturated fat intake                               | MR Egger                  | 4.620881 | 9   | 0.866027 |
| Polyunsaturated fat intake                         | MR Egger                  | 16.22174 | 13  | 0.237363 |
| Total sugar intake                                 | MR Egger                  | 12.15255 | 16  | 0.733413 |
| Blood methionine                                   | MR Egger                  | 8.608551 | 11  | 0.657974 |
| Blood selenium                                     | MR Egger                  | 7.938914 | 10  | 0.634804 |
| Blood zinc                                         | MR Egger                  | 8.121114 | 5   | 0.149686 |
| Vitamin D intake                                   | MR Egger                  | 13.62683 | 12  | 0.32517  |
| Carotene intake                                    | MR Egger                  | 7.810158 | 14  | 0.89898  |
| Iron intake                                        | MR Egger                  | 8.38207  | 11  | 0.678725 |
| Calcium intake                                     | MR Egger                  | 14.40562 | 17  | 0.638211 |
| Folate intake                                      | MR Egger                  | 10.22226 | 12  | 0.596469 |
| Vitamin B6 intake                                  | MR Egger                  | 27.59448 | 14  | 0.016097 |
| Vitamin B12 intake                                 | MR Egger                  | 8.59822  | 7   | 0.282803 |
| Vitamin E intake                                   | MR Egger                  | 7.664051 | 9   | 0.568324 |
| Omega-3 status                                     | MR Egger                  | 54.48401 | 47  | 0.211179 |
| Omega-6 status                                     | MR Egger                  | 49.42193 | 51  | 0.536513 |
| Omega-7, omega-9, and saturated fatty acids        | MR Egger                  | 3.278916 | 5   | 0.657071 |
| Eicosapentaenoic acid status                       | MR Egger                  | 3.105548 | 5   | 0.683717 |
| Docosahexaenoic acid status                        | MR Egger                  | 38.35379 | 33  | 0.239619 |
| Years of schooling                                 | MR Egger                  | 350.3478 | 303 | 0.031571 |

|                                                    |          |          |     |          |
|----------------------------------------------------|----------|----------|-----|----------|
| Stress owing to financial difficulties             | MR Egger | 92.5276  | 84  | 0.245749 |
| Anxiety disorder                                   | MR Egger | 16.9909  | 15  | 0.319409 |
| Depression                                         | MR Egger | 37.93722 | 29  | 0.123739 |
| Sleep duration                                     | MR Egger | 78.16502 | 67  | 0.165406 |
| Night shift work                                   | MR Egger | 2.306886 | 5   | 0.805255 |
| Snoring                                            | MR Egger | 40.50421 | 39  | 0.403803 |
| Insomnia                                           | MR Egger | 38.64267 | 37  | 0.395306 |
| Years of smoking                                   | MR Egger | 6.29825  | 8   | 0.613862 |
| Heavy physical activity                            | MR Egger | 22.71417 | 15  | 0.0904   |
| Light physical activity                            | MR Egger | 11.15277 | 10  | 0.34574  |
| Number of days/weeks of vigorous physical activity | MR Egger | 8.069782 | 9   | 0.527129 |
| Number of days/weeks of moderate physical activity | MR Egger | 11.59868 | 16  | 0.771114 |
| Body mass index                                    | MR Egger | 441.4253 | 430 | 0.341312 |
| Waist-to-hip ratio                                 | MR Egger | 21.23591 | 28  | 0.815377 |
| Fasting glucose                                    | MR Egger | 30.34784 | 28  | 0.346786 |
| Fasting proinsulin                                 | MR Egger | 6.598684 | 6   | 0.359559 |
| Hemoglobin A1c                                     | MR Egger | 19.09216 | 9   | 0.024421 |
| Systolic blood pressure                            | MR Egger | 469.5703 | 435 | 0.122047 |
| Diastolic blood pressure                           | MR Egger | 496.7136 | 435 | 0.021529 |
| High density lipoprotein                           | MR Egger | 351.073  | 324 | 0.14428  |
| Low density lipoprotein                            | MR Egger | 160.9219 | 156 | 0.376978 |
| Total cholesterol                                  | MR Egger | 91.75238 | 82  | 0.216265 |
| Total triglycerides                                | MR Egger | 14.42383 | 10  | 0.154522 |

**Table 6. Weighted median analysis of risk factors of MWA**

| Exposure                                    | No. of SNP | Beta     | se       | P-value  | OR       | 95%CI lower bound | 95%CI upper bound |
|---------------------------------------------|------------|----------|----------|----------|----------|-------------------|-------------------|
| Alcohol intake frequency                    | 42         | 0.091481 | 0.235491 | 0.69767  | 1.095796 | 0.690678          | 1.738534          |
| Alcoholic drinks per week                   | 34         | -0.2259  | 0.443892 | 0.610825 | 0.797802 | 0.334231          | 1.904336          |
| Average weekly red wine intake              | 18         | -0.80541 | 0.692199 | 0.244607 | 0.446906 | 0.115081          | 1.735513          |
| Coffee intake                               | 38         | -0.71041 | 0.453556 | 0.117275 | 0.491442 | 0.202022          | 1.195492          |
| Decaffeinated coffee intake                 | 14         | -0.1154  | 0.548614 | 0.833392 | 0.891007 | 0.304013          | 2.611384          |
| Carbohydrate                                | 19         | -0.18732 | 0.329867 | 0.570122 | 0.829176 | 0.434369          | 1.582834          |
| Process meat                                | 23         | -0.6163  | 0.555629 | 0.267347 | 0.539938 | 0.181712          | 1.604374          |
| Cheese intake                               | 61         | -0.1531  | 0.349091 | 0.660966 | 0.85804  | 0.432868          | 1.700827          |
| Saturated fat intake                        | 11         | 0.159508 | 0.417188 | 0.702208 | 1.172934 | 0.517792          | 2.656999          |
| Polyunsaturated fat intake                  | 15         | -0.12369 | 0.290373 | 0.670117 | 0.883649 | 0.500161          | 1.56117           |
| Total sugar intake                          | 18         | -0.05913 | 0.302817 | 0.845192 | 0.942587 | 0.520666          | 1.706413          |
| Blood methionine                            | 13         | 0.115562 | 1.426153 | 0.935417 | 1.122505 | 0.068584          | 18.37189          |
| Blood selenium                              | 12         | -0.19813 | 3.566065 | 0.955692 | 0.820262 | 0.000756          | 890.1207          |
| Blood zinc                                  | 7          | 0.013289 | 0.078615 | 0.865765 | 1.013378 | 0.868667          | 1.182196          |
| Vitamin D intake                            | 14         | 9.892217 | 5.346817 | 0.064297 | 19775.85 | 0.55569           | 7.04E+08          |
| Carotene intake                             | 16         | -0.16341 | 0.3163   | 0.605406 | 0.84924  | 0.456867          | 1.578594          |
| Iron intake                                 | 13         | 0.039984 | 0.382766 | 0.916804 | 1.040794 | 0.491528          | 2.203847          |
| Calcium intake                              | 19         | -0.11841 | 0.3146   | 0.706643 | 0.888336 | 0.479495          | 1.645773          |
| Folate intake                               | 14         | 0.422107 | 0.296076 | 0.153963 | 1.525172 | 0.853678          | 2.724857          |
| Vitamin B6 intake                           | 16         | -0.0348  | 0.361364 | 0.923275 | 0.965796 | 0.475648          | 1.961033          |
| Vitamin B12 intake                          | 9          | 0.03462  | 0.381568 | 0.927707 | 1.035226 | 0.490048          | 2.186916          |
| Vitamin E intake                            | 9          | 0.03462  | 0.381568 | 0.927707 | 1.035226 | 0.490048          | 2.186916          |
| Omega-3 status                              | 49         | 0.063867 | 0.069497 | 0.3581   | 1.065951 | 0.930208          | 1.221501          |
| Omega-6 status                              | 53         | 0.019915 | 0.124463 | 0.872873 | 1.020115 | 0.79929           | 1.301948          |
| Omega-7, omega-9, and saturated fatty acids | 7          | 0.090905 | 0.127581 | 0.476135 | 1.095165 | 0.852866          | 1.406302          |
| Eicosapentaenoic acid status                | 7          | 0.854388 | 0.586522 | 0.145199 | 2.349936 | 0.744386          | 7.418457          |
| Docosahexaenoic acid status                 | 35         | -0.15436 | 0.362906 | 0.67058  | 0.856961 | 0.420774          | 1.745311          |
| Years of schooling                          | 305        | -0.30769 | 0.184873 | 0.096047 | 0.735143 | 0.511688          | 1.056183          |
| Stress owing to financial difficulties      | 86         | 1.183122 | 1.242617 | 0.341036 | 3.264549 | 0.285816          | 37.28723          |
| Anxiety disorder                            | 17         | -17.8656 | 12.30314 | 0.146469 | 1.74E-08 | 5.87E-19          | 517.2543          |
| Depression                                  | 31         | 4.585622 | 2.627691 | 0.080965 | 98.06412 | 0.568557          | 16913.99          |
| Sleep duration                              | 69         | -0.24387 | 0.427324 | 0.56821  | 0.78359  | 0.339112          | 1.810648          |
| Night shift work                            | 7          | -0.16001 | 0.419826 | 0.703096 | 0.852131 | 0.374234          | 1.940305          |

|                                                    |     |          |          |          |          |          |          |
|----------------------------------------------------|-----|----------|----------|----------|----------|----------|----------|
| Snoring                                            | 41  | 1.702968 | 0.92506  | 0.065632 | 5.490219 | 0.895701 | 33.65242 |
| Insomnia                                           | 39  | 0.259164 | 0.638205 | 0.684682 | 1.295846 | 0.370939 | 4.526938 |
| Years of smoking                                   | 10  | 0.229054 | 0.334519 | 0.493517 | 1.25741  | 0.652722 | 2.422286 |
| Heavy physical activity                            | 17  | -0.61112 | 1.501521 | 0.684006 | 0.542741 | 0.028607 | 10.29706 |
| Light physical activity                            | 12  | -0.9735  | 1.596461 | 0.542001 | 0.377757 | 0.01653  | 8.632704 |
| Number of days/weeks of vigorous physical activity | 11  | 0.220891 | 0.40058  | 0.581341 | 1.247187 | 0.568789 | 2.734713 |
| Number of days/weeks of moderate physical activity | 18  | 0.036407 | 0.28679  | 0.898982 | 1.037078 | 0.591141 | 1.819416 |
| Body mass index                                    | 432 | -0.16573 | 0.121881 | 0.173891 | 0.847271 | 0.66723  | 1.075894 |
| Waist-to-hip ratio                                 | 30  | -0.43842 | 0.290859 | 0.131727 | 0.645054 | 0.364764 | 1.140725 |
| Fasting glucose                                    | 30  | 0.735503 | 0.305492 | 0.016058 | 2.08653  | 1.146528 | 3.797212 |
| Fasting proinsulin                                 | 8   | -0.11859 | 0.167777 | 0.479657 | 0.888168 | 0.639265 | 1.233985 |
| Hemoglobin A1c                                     | 11  | 0.926465 | 0.419042 | 0.027042 | 2.525566 | 1.11087  | 5.74188  |
| Systolic blood pressure                            | 437 | 0.009357 | 0.007547 | 0.215038 | 1.009401 | 0.99458  | 1.024442 |
| Diastolic blood pressure                           | 437 | 0.018659 | 0.012239 | 0.127354 | 1.018834 | 0.994686 | 1.043569 |
| High density lipoprotein                           | 326 | -0.11625 | 0.104721 | 0.26696  | 0.890252 | 0.725058 | 1.093085 |
| Low density lipoprotein                            | 158 | -0.08025 | 0.111111 | 0.470142 | 0.922886 | 0.74228  | 1.147434 |
| Total cholesterol                                  | 84  | 0.003339 | 0.101503 | 0.973756 | 1.003345 | 0.822335 | 1.224198 |
| Total triglycerides                                | 12  | 0.055942 | 0.101394 | 0.581134 | 1.057536 | 0.866936 | 1.290042 |

**eTable 7. MR-Egger analysis of risk factors of MWA**

| Exposure                                    | No. of SNP | Beta     | se       | P-value  | OR       | 95%CI lower bound | 95%CI upper bound |
|---------------------------------------------|------------|----------|----------|----------|----------|-------------------|-------------------|
| Alcohol intake frequency                    | 42         | 0.340566 | 0.451461 | 0.455049 | 1.405744 | 0.580249          | 3.405633          |
| Alcoholic drinks per week                   | 34         | -0.38926 | 0.768799 | 0.616103 | 0.677559 | 0.150152          | 3.057472          |
| Average weekly red wine intake              | 18         | -2.63526 | 2.606404 | 0.32703  | 0.071701 | 0.000433          | 11.86148          |
| Coffee intake                               | 38         | -0.60255 | 0.586955 | 0.311471 | 0.547413 | 0.173256          | 1.729584          |
| Decaffeinated coffee intake                 | 14         | -0.48368 | 0.720924 | 0.514979 | 0.61651  | 0.150064          | 2.532811          |
| Carbohydrate                                | 19         | 0.434101 | 0.741906 | 0.566156 | 1.543575 | 0.360582          | 6.60771           |
| Process meat                                | 23         | -0.01281 | 2.239258 | 0.995491 | 0.987276 | 0.012256          | 79.53044          |
| Cheese intake                               | 61         | -0.47306 | 1.194192 | 0.693433 | 0.62309  | 0.059984          | 6.472441          |
| Saturated fat intake                        | 11         | 0.96017  | 0.90286  | 0.315266 | 2.612141 | 0.445109          | 15.32944          |
| Polyunsaturated fat intake                  | 15         | -0.13355 | 0.387357 | 0.73577  | 0.874979 | 0.409518          | 1.869487          |
| Total sugar intake                          | 18         | 0.309186 | 0.448424 | 0.50039  | 1.362315 | 0.565681          | 3.280828          |
| Blood methionine                            | 13         | -0.35897 | 3.623797 | 0.922873 | 0.698395 | 0.000575          | 848.6699          |
| Blood selenium                              | 12         | 22.12363 | 59.5043  | 0.7178   | 4.06E+09 | 9.06E-42          | 1.82E+60          |
| Blood zinc                                  | 7          | 0.552969 | 0.229192 | 0.060663 | 1.738407 | 1.109325          | 2.724231          |
| Vitamin D intake                            | 14         | 25.41854 | 17.01139 | 0.160945 | 1.09E+11 | 0.000362          | 3.31E+25          |
| Carotene intake                             | 16         | -0.33438 | 0.528937 | 0.537459 | 0.71578  | 0.253828          | 2.018461          |
| Iron intake                                 | 13         | -0.5153  | 0.82958  | 0.547152 | 0.597321 | 0.117505          | 3.036413          |
| Calcium intake                              | 19         | -0.27272 | 0.963036 | 0.780453 | 0.761306 | 0.115294          | 5.027035          |
| Folate intake                               | 14         | 0.194705 | 0.422511 | 0.653163 | 1.214952 | 0.530775          | 2.781042          |
| Vitamin B6 intake                           | 16         | -0.38269 | 0.59052  | 0.527439 | 0.682027 | 0.214358          | 2.170014          |
| Vitamin B12 intake                          | 9          | 0.600119 | 0.688389 | 0.412232 | 1.822336 | 0.472781          | 7.0242            |
| Vitamin E intake                            | 9          | 0.600119 | 0.688389 | 0.412232 | 1.822336 | 0.472781          | 7.0242            |
| Omega-3 status                              | 49         | 0.06789  | 0.087177 | 0.440022 | 1.070248 | 0.902148          | 1.26967           |
| Omega-6 status                              | 53         | -0.19595 | 0.177303 | 0.274269 | 0.822052 | 0.580732          | 1.163651          |
| Omega-7, omega-9, and saturated fatty acids | 7          | 0.566622 | 0.400208 | 0.215994 | 1.762304 | 0.804298          | 3.861398          |
| Eicosapentaenoic acid status                | 7          | 1.591766 | 1.307155 | 0.277652 | 4.912417 | 0.378986          | 63.67483          |
| Docosahexaenoic acid status                 | 35         | 0.750011 | 0.700426 | 0.292032 | 2.117023 | 0.536428          | 8.354875          |
| Years of schooling                          | 305        | 0.174072 | 0.469135 | 0.710861 | 1.190141 | 0.474528          | 2.984932          |
| Stress owing to financial difficulties      | 86         | -3.43619 | 2.573647 | 0.185437 | 0.032187 | 0.000207          | 4.993625          |

|                                                    |     |          |          |          |          |          |          |
|----------------------------------------------------|-----|----------|----------|----------|----------|----------|----------|
| Anxiety disorder                                   | 17  | -37.6927 | 19.31264 | 0.069901 | 4.27E-17 | 1.55E-33 | 1.173559 |
| Depression                                         | 31  | 6.512701 | 5.238197 | 0.223712 | 673.6437 | 0.02342  | 19376417 |
| Sleep duration                                     | 69  | 2.350212 | 1.156892 | 0.046175 | 10.48779 | 1.08622  | 101.2629 |
| Night shift work                                   | 7   | 0.442243 | 1.166277 | 0.720115 | 1.556193 | 0.158237 | 15.30448 |
| Snoring                                            | 41  | 0.867606 | 3.67987  | 0.814844 | 2.381203 | 0.001756 | 3229.722 |
| Insomnia                                           | 39  | 0.362131 | 1.234403 | 0.770882 | 1.436387 | 0.127799 | 16.14419 |
| Years of smoking                                   | 10  | 0.198676 | 0.733416 | 0.793333 | 1.219786 | 0.289726 | 5.135468 |
| Heavy physical activity                            | 17  | 7.530276 | 7.901219 | 0.35567  | 1863.62  | 0.000351 | 9.91E+09 |
| Light physical activity                            | 12  | 3.209882 | 4.744498 | 0.514036 | 24.77615 | 0.002267 | 270789.6 |
| Number of days/weeks of vigorous physical activity | 11  | 1.0782   | 2.65299  | 0.693936 | 2.939384 | 0.016218 | 532.7539 |
| Number of days/weeks of moderate physical activity | 18  | 1.206544 | 1.321189 | 0.37468  | 3.341913 | 0.250828 | 44.52606 |
| Body mass index                                    | 432 | -0.39616 | 0.218606 | 0.070652 | 0.6729   | 0.438399 | 1.032837 |
| Waist-to-hip ratio                                 | 30  | -0.65746 | 0.96259  | 0.50021  | 0.518164 | 0.078541 | 3.418537 |
| Fasting glucose                                    | 30  | -0.35147 | 0.482828 | 0.472698 | 0.703655 | 0.273129 | 1.812806 |
| Fasting proinsulin                                 | 8   | 0.235511 | 0.31001  | 0.476221 | 1.265555 | 0.689279 | 2.323631 |
| Hemoglobin A1c                                     | 11  | -1.26642 | 0.802096 | 0.148817 | 0.281838 | 0.058511 | 1.357554 |
| Systolic blood pressure                            | 437 | 0.01125  | 0.012791 | 0.379583 | 1.011314 | 0.986275 | 1.036988 |
| Diastolic blood pressure                           | 437 | 0.011249 | 0.020191 | 0.577747 | 1.011312 | 0.972071 | 1.052138 |
| High density lipoprotein                           | 326 | -0.06958 | 0.09024  | 0.441215 | 0.932782 | 0.781567 | 1.113254 |
| Low density lipoprotein                            | 158 | -0.01236 | 0.112979 | 0.91305  | 0.98772  | 0.791524 | 1.232547 |
| Total cholesterol                                  | 84  | -0.04891 | 0.109995 | 0.65771  | 0.952263 | 0.767586 | 1.181371 |
| Total triglycerides                                | 12  | 0.036953 | 0.214638 | 0.866744 | 1.037644 | 0.68131  | 1.580345 |

**eTable 8. IVW Radial analysis (MwA)**

| Exposure                                    | No. of SNP | Beta     | se       | P-value  | OR       | 95%CI lower bound | 95%CI upper bound |
|---------------------------------------------|------------|----------|----------|----------|----------|-------------------|-------------------|
| Alcohol intake frequency                    | 42         | -0.04067 | 0.132961 | 0.759689 | 0.960145 | 0.739874          | 1.245992          |
| Alcoholic drinks per week                   | 34         | -0.06025 | 0.327978 | 0.854241 | 0.941526 | 0.495053          | 1.790659          |
| Average weekly red wine intake              | 18         | -0.68467 | 0.533209 | 0.199119 | 0.504254 | 0.177326          | 1.433924          |
| Coffee intake                               | 38         | -0.93305 | 0.288312 | 0.001211 | 0.393352 | 0.223545          | 0.692146          |
| Decaffeinated coffee intake                 | 14         | -0.07827 | 0.401695 | 0.84552  | 0.924719 | 0.420804          | 2.032074          |
| Carbohydrate                                | 19         | -0.00817 | 0.270878 | 0.975924 | 0.991858 | 0.583276          | 1.686652          |
| Process meat                                | 23         | -0.23757 | 0.435902 | 0.585744 | 0.78854  | 0.335565          | 1.85298           |
| Cheese intake                               | 61         | -0.07756 | 0.280614 | 0.782247 | 0.925372 | 0.533892          | 1.603908          |
| Saturated fat intake                        | 11         | 0.006641 | 0.307005 | 0.982743 | 1.006663 | 0.551514          | 1.837434          |
| Polyunsaturated fat intake                  | 15         | -0.36082 | 0.20034  | 0.071699 | 0.697107 | 0.470725          | 1.032362          |
| Total sugar intake                          | 18         | -0.09917 | 0.211876 | 0.63973  | 0.905585 | 0.597829          | 1.371772          |
| Blood methionine                            | 13         | -0.30644 | 0.683683 | 0.653994 | 0.736062 | 0.192731          | 2.811107          |
| Blood selenium                              | 12         | -2.10971 | 2.825766 | 0.455306 | 0.121273 | 0.000477          | 30.83919          |
| Blood zinc                                  | 7          | -0.02398 | 0.076034 | 0.752473 | 0.976306 | 0.841133          | 1.133201          |
| Vitamin D intake                            | 14         | 4.180866 | 3.85143  | 0.277684 | 65.42247 | 0.034461          | 124202.5          |
| Carotene intake                             | 16         | -0.10434 | 0.239955 | 0.663695 | 0.900922 | 0.562903          | 1.441919          |
| Iron intake                                 | 13         | -0.33376 | 0.302907 | 0.270525 | 0.716226 | 0.395559          | 1.29685           |
| Calcium intake                              | 19         | 0.047041 | 0.245274 | 0.847907 | 1.048165 | 0.648109          | 1.695162          |
| Folate intake                               | 14         | 0.202591 | 0.215931 | 0.348131 | 1.224571 | 0.80201           | 1.86977           |
| Vitamin B6 intake                           | 16         | -0.1764  | 0.25008  | 0.480576 | 0.838283 | 0.513474          | 1.368556          |
| Vitamin B12 intake                          | 9          | 0.320575 | 0.231716 | 0.166517 | 1.37792  | 0.87495           | 2.170026          |
| Vitamin E intake                            | 11         | -0.25844 | 0.353051 | 0.464154 | 0.772254 | 0.386578          | 1.542707          |
| Omega-3 status                              | 49         | 0.021944 | 0.062357 | 0.724913 | 1.022186 | 0.904587          | 1.155073          |
| Omega-6 status                              | 53         | -0.07729 | 0.087631 | 0.377766 | 0.925619 | 0.779541          | 1.099071          |
| Omega-7, omega-9, and saturated fatty acids | 7          | 0.054453 | 0.089116 | 0.541175 | 1.055963 | 0.886731          | 1.257494          |
| Eicosapentaenoic acid status                | 7          | 0.932142 | 0.283187 | 0.000996 | 2.539943 | 1.458042          | 4.424638          |
| Docosahexaenoic acid status                 | 35         | 0.074196 | 0.285711 | 0.795103 | 1.077018 | 0.615206          | 1.885494          |
| Years of schooling                          | 305        | -0.14917 | 0.115723 | 0.197385 | 0.861422 | 0.686611          | 1.08074           |
| Stress owing to financial difficulties      | 86         | 1.226929 | 0.868299 | 0.157648 | 3.410739 | 0.621924          | 18.70508          |
| Anxiety disorder                            | 17         | -6.25401 | 9.672942 | 0.517925 | 0.001923 | 1.12E-11          | 329375.6          |
| Depression                                  | 31         | 2.669394 | 1.520228 | 0.079103 | 14.43122 | 0.733261          | 284.0191          |
| Sleep duration                              | 69         | -0.10856 | 0.271682 | 0.689462 | 0.897125 | 0.526736          | 1.527964          |
| Night shift work                            | 7          | 0.22127  | 0.35181  | 0.529385 | 1.24766  | 0.626079          | 2.486356          |
| Snoring                                     | 41         | 0.926303 | 0.690314 | 0.179642 | 2.525158 | 0.652652          | 9.770022          |
| Insomnia                                    | 39         | 0.198589 | 0.419304 | 0.635775 | 1.21968  | 0.5362            | 2.774372          |
| Years of smoking                            | 10         | 0.400482 | 0.297959 | 0.178921 | 1.492544 | 0.832337          | 2.676423          |

|                                                    |     |          |          |          |          |          |          |
|----------------------------------------------------|-----|----------|----------|----------|----------|----------|----------|
| Heavy physical activity                            | 17  | -0.61365 | 1.260779 | 0.626456 | 0.541373 | 0.04574  | 6.407568 |
| Light physical activity                            | 12  | -2.43195 | 1.210961 | 0.044614 | 0.087866 | 0.008185 | 0.943214 |
| Number of days/weeks of vigorous physical activity | 11  | 0.077728 | 0.320091 | 0.808135 | 1.080829 | 0.577152 | 2.024061 |
| Number of days/weeks of moderate physical activity | 18  | -0.31888 | 0.214561 | 0.137227 | 0.726963 | 0.477391 | 1.107007 |
| Body mass index                                    | 432 | -0.10026 | 0.080609 | 0.213593 | 0.904605 | 0.772402 | 1.059435 |
| Waist-to-hip ratio                                 | 30  | -0.21365 | 0.216098 | 0.322818 | 0.807629 | 0.528769 | 1.233554 |
| Fasting glucose                                    | 30  | 0.101304 | 0.226524 | 0.654722 | 1.106613 | 0.709863 | 1.725111 |
| Fasting proinsulin                                 | 8   | -0.03499 | 0.114473 | 0.759858 | 0.965615 | 0.771547 | 1.208495 |
| Hemoglobin A1c                                     | 11  | 0.318923 | 0.367011 | 0.384862 | 1.375646 | 0.670039 | 2.824315 |
| Systolic blood pressure                            | 437 | 0.008096 | 0.005082 | 0.111133 | 1.008129 | 0.998137 | 1.018221 |
| Diastolic blood pressure                           | 437 | 0.011514 | 0.008313 | 0.166005 | 1.011581 | 0.995233 | 1.028198 |
| High density lipoprotein                           | 326 | -0.10304 | 0.059217 | 0.081844 | 0.902089 | 0.803236 | 1.013108 |
| Low density lipoprotein                            | 158 | -0.09594 | 0.077113 | 0.21345  | 0.90852  | 0.781079 | 1.056754 |
| Total cholesterol                                  | 84  | -0.0122  | 0.067199 | 0.855989 | 0.987879 | 0.86597  | 1.12695  |
| Total triglycerides                                | 12  | 0.049566 | 0.071933 | 0.490789 | 1.050815 | 0.912632 | 1.20992  |

**eTable 9. Heterogeneity test (MwA)**

| Exposure                                    | method                    | Q-value  | Q_df | P-value  |
|---------------------------------------------|---------------------------|----------|------|----------|
| Alcohol intake frequency                    | Inverse variance weighted | 29.2125  | 41   | 0.915762 |
| Alcoholic drinks per week                   | Inverse variance weighted | 37.96156 | 33   | 0.253425 |
| Average weekly red wine intake              | Inverse variance weighted | 22.28887 | 17   | 0.173863 |
| Coffee intake                               | Inverse variance weighted | 36.16027 | 37   | 0.508226 |
| Decaffeinated coffee intake                 | Inverse variance weighted | 14.94853 | 13   | 0.310577 |
| Carbohydrate                                | Inverse variance weighted | 27.41909 | 18   | 0.071463 |
| Process meat                                | Inverse variance weighted | 25.72741 | 22   | 0.26357  |
| Cheese intake                               | Inverse variance weighted | 91.23073 | 60   | 0.005769 |
| Saturated fat intake                        | Inverse variance weighted | 10.66286 | 10   | 0.38438  |
| Polyunsaturated fat intake                  | Inverse variance weighted | 12.08539 | 14   | 0.599445 |
| Total sugar intake                          | Inverse variance weighted | 18.77713 | 17   | 0.341473 |
| Blood methionine                            | Inverse variance weighted | 4.591952 | 12   | 0.97024  |
| Blood selenium                              | Inverse variance weighted | 15.3491  | 11   | 0.167066 |
| Blood zinc                                  | Inverse variance weighted | 9.607043 | 6    | 0.142206 |
| Vitamin D intake                            | Inverse variance weighted | 14.9847  | 13   | 0.308309 |
| Carotene intake                             | Inverse variance weighted | 15.83885 | 15   | 0.392842 |
| Iron intake                                 | Inverse variance weighted | 14.31442 | 12   | 0.281082 |
| Calcium intake                              | Inverse variance weighted | 22.18641 | 18   | 0.223814 |
| Folate intake                               | Inverse variance weighted | 12.39652 | 13   | 0.495428 |
| Vitamin B6 intake                           | Inverse variance weighted | 16.98509 | 15   | 0.319757 |
| Vitamin B12 intake                          | Inverse variance weighted | 5.022659 | 8    | 0.755152 |
| Vitamin E intake                            | Inverse variance weighted | 23.01984 | 10   | 0.010674 |
| Omega-3 status                              | Inverse variance weighted | 63.6425  | 48   | 0.064699 |
| Omega-6 status                              | Inverse variance weighted | 64.267   | 52   | 0.11826  |
| Omega-7, omega-9, and saturated fatty acids | Inverse variance weighted | 4.866456 | 6    | 0.561052 |
| Eicosapentaenoic acid status                | Inverse variance weighted | 2.270688 | 6    | 0.893197 |
| Docosahexaenoic acid status                 | Inverse variance weighted | 48.15064 | 34   | 0.054636 |
| Years of schooling                          | Inverse variance weighted | 282.9135 | 304  | 0.801943 |
| Stress owing to financial difficulties      | Inverse variance weighted | 104.6123 | 85   | 0.073225 |
| Anxiety disorder                            | Inverse variance weighted | 19.3802  | 16   | 0.249441 |
| Depression                                  | Inverse variance weighted | 19.66773 | 30   | 0.924907 |
| Sleep duration                              | Inverse variance weighted | 58.65464 | 68   | 0.783315 |
| Night shift work                            | Inverse variance weighted | 9.749629 | 6    | 0.135599 |
| Snoring                                     | Inverse variance weighted | 52.38347 | 40   | 0.090806 |
| Insomnia                                    | Inverse variance weighted | 44.58331 | 38   | 0.214469 |
| Years of smoking                            | Inverse variance weighted | 11.86214 | 9    | 0.221193 |
| Heavy physical activity                     | Inverse variance weighted | 22.28939 | 16   | 0.134091 |
| Light physical activity                     | Inverse variance weighted | 12.13179 | 11   | 0.353819 |
| Number of days/weeks of vigorous            | Inverse variance weighted | 12.23356 | 10   | 0.269729 |

|                                                    |                           |          |     |          |
|----------------------------------------------------|---------------------------|----------|-----|----------|
| physical activity                                  |                           |          |     |          |
| Number of days/weeks of moderate physical activity | Inverse variance weighted | 18.63052 | 17  | 0.350148 |
| Body mass index                                    | Inverse variance weighted | 479.5209 | 431 | 0.052951 |
| Waist-to-hip ratio                                 | Inverse variance weighted | 33.41923 | 29  | 0.261154 |
| Fasting glucose                                    | Inverse variance weighted | 36.99278 | 29  | 0.146409 |
| Fasting proinsulin                                 | Inverse variance weighted | 5.401465 | 7   | 0.611094 |
| Hemoglobin A1c                                     | Inverse variance weighted | 17.31995 | 10  | 0.067577 |
| Systolic blood pressure                            | Inverse variance weighted | 548.7154 | 436 | 0.000191 |
| Diastolic blood pressure                           | Inverse variance weighted | 515.9399 | 436 | 0.004945 |
| High density lipoprotein                           | Inverse variance weighted | 347.9631 | 325 | 0.182386 |
| Low density lipoprotein                            | Inverse variance weighted | 196.3763 | 157 | 0.018021 |
| Total cholesterol                                  | Inverse variance weighted | 106.7175 | 83  | 0.040878 |
| Total triglycerides                                | Inverse variance weighted | 9.881199 | 11  | 0.541104 |
| Alcohol intake frequency                           | MR Egger                  | 28.40055 | 40  | 0.915019 |
| Alcoholic drinks per week                          | MR Egger                  | 37.6964  | 32  | 0.224825 |
| Average weekly red wine intake                     | MR Egger                  | 21.50254 | 16  | 0.159992 |
| Coffee intake                                      | MR Egger                  | 35.73913 | 36  | 0.480899 |
| Decaffeinated coffee intake                        | MR Egger                  | 14.38791 | 12  | 0.276626 |
| Carbohydrate                                       | MR Egger                  | 26.77003 | 17  | 0.061528 |
| Process meat                                       | MR Egger                  | 25.71456 | 21  | 0.217543 |
| Cheese intake                                      | MR Egger                  | 91.0514  | 59  | 0.004673 |
| Saturated fat intake                               | MR Egger                  | 9.356032 | 9   | 0.405079 |
| Polyunsaturated fat intake                         | MR Egger                  | 11.58442 | 13  | 0.56198  |
| Total sugar intake                                 | MR Egger                  | 17.60438 | 16  | 0.347567 |
| Blood methionine                                   | MR Egger                  | 4.59172  | 11  | 0.949318 |
| Blood selenium                                     | MR Egger                  | 15.09808 | 10  | 0.128527 |
| Blood zinc                                         | MR Egger                  | 2.802571 | 5   | 0.730391 |
| Vitamin D intake                                   | MR Egger                  | 13.18406 | 12  | 0.355806 |
| Carotene intake                                    | MR Egger                  | 15.57013 | 14  | 0.340324 |
| Iron intake                                        | MR Egger                  | 14.24207 | 11  | 0.219887 |
| Calcium intake                                     | MR Egger                  | 22.03306 | 17  | 0.183451 |
| Folate intake                                      | MR Egger                  | 12.39595 | 12  | 0.414427 |
| Vitamin B6 intake                                  | MR Egger                  | 16.80478 | 14  | 0.26673  |
| Vitamin B12 intake                                 | MR Egger                  | 4.820548 | 7   | 0.681852 |
| Vitamin E intake                                   | MR Egger                  | 22.86047 | 9   | 0.006517 |
| Omega-3 status                                     | MR Egger                  | 62.87552 | 47  | 0.06061  |
| Omega-6 status                                     | MR Egger                  | 63.52689 | 51  | 0.11198  |
| Omega-7, omega-9, and saturated fatty acids        | MR Egger                  | 3.122049 | 5   | 0.681176 |
| Eicosapentaenoic acid status                       | MR Egger                  | 1.98066  | 5   | 0.851815 |
| Docosahexaenoic acid status                        | MR Egger                  | 46.57595 | 33  | 0.058841 |
| Years of schooling                                 | MR Egger                  | 282.4094 | 303 | 0.796428 |

|                                                    |          |          |     |          |
|----------------------------------------------------|----------|----------|-----|----------|
| Stress owing to financial difficulties             | MR Egger | 100.2097 | 84  | 0.109566 |
| Anxiety disorder                                   | MR Egger | 15.81132 | 15  | 0.394701 |
| Depression                                         | MR Egger | 19.05042 | 29  | 0.919988 |
| Sleep duration                                     | MR Egger | 54.02146 | 67  | 0.873776 |
| Night shift work                                   | MR Egger | 9.671875 | 5   | 0.085085 |
| Snoring                                            | MR Egger | 52.38312 | 39  | 0.074405 |
| Insomnia                                           | MR Egger | 44.56036 | 37  | 0.183627 |
| Years of smoking                                   | MR Egger | 11.72638 | 8   | 0.163836 |
| Heavy physical activity                            | MR Egger | 20.77951 | 15  | 0.144023 |
| Light physical activity                            | MR Egger | 10.54294 | 10  | 0.394217 |
| Number of days/weeks of vigorous physical activity | MR Egger | 12.04023 | 9   | 0.211051 |
| Number of days/weeks of moderate physical activity | MR Egger | 17.16273 | 16  | 0.375143 |
| Body mass index                                    | MR Egger | 477.1664 | 430 | 0.05756  |
| Waist-to-hip ratio                                 | MR Egger | 33.15376 | 28  | 0.230129 |
| Fasting glucose                                    | MR Egger | 35.56238 | 28  | 0.154083 |
| Fasting proinsulin                                 | MR Egger | 4.47672  | 6   | 0.612447 |
| Hemoglobin A1c                                     | MR Egger | 11.44714 | 9   | 0.2463   |
| Systolic blood pressure                            | MR Egger | 548.6214 | 435 | 0.00017  |
| Diastolic blood pressure                           | MR Egger | 515.9397 | 435 | 0.004493 |
| High density lipoprotein                           | MR Egger | 347.6988 | 324 | 0.174833 |
| Low density lipoprotein                            | MR Egger | 195.0949 | 156 | 0.018376 |
| Total cholesterol                                  | MR Egger | 106.4852 | 82  | 0.035922 |
| Total triglycerides                                | MR Egger | 9.877253 | 10  | 0.451328 |
